# Supplementary material
Source: PubMed Central journal article supplement (PMC3301991)

## Online Supporting Material

**SUPPLEMENTAL TABLE 1** Physiological variables of normal, *db/db*, and *db/db+G* mice treated for 8 wk<sup>1</sup>

| Characteristics                            | <i>n</i> | Normal                  | <i>db/db</i>            | <i>db/db+G</i>          |
|--------------------------------------------|----------|-------------------------|-------------------------|-------------------------|
| Body weight, <i>g</i>                      | 20       | 30.1 ± 0.4 <sup>b</sup> | 43.6 ± 0.8 <sup>a</sup> | 44.2 ± 0.8 <sup>a</sup> |
| Food intake, <i>g/day</i>                  | 20       | 2.2 ± 0.1 <sup>b</sup>  | 4.8 ± 0.3 <sup>a</sup>  | 4.2 ± 0.3 <sup>a</sup>  |
| Blood glucose <sup>2</sup> , <i>mmol/L</i> | 10       | 6.6 ± 0.3 <sup>c</sup>  | 27.2 ± 2.8 <sup>a</sup> | 17.6 ± 0.9 <sup>b</sup> |
| Serum lipids                               |          |                         |                         |                         |
| Total cholesterol, <i>mmol/L</i>           | 8        | 3.9 ± 0.3 <sup>b</sup>  | 5.0 ± 0.2 <sup>a</sup>  | 5.5 ± 0.3 <sup>a</sup>  |
| Triglycerides, <i>mmol/L</i>               | 6        | 1.2 ± 0.1 <sup>b</sup>  | 2.5 ± 0.2 <sup>a</sup>  | 2.0 ± 0.3 <sup>a</sup>  |
| HDL-cholesterol, <i>mmol/L</i>             | 6        | 1.2 ± 0.1 <sup>b</sup>  | 1.4 ± 0.1 <sup>ab</sup> | 1.6 ± 0.1 <sup>a</sup>  |
| Blood pressure, <i>mm Hg</i>               | 8        |                         |                         |                         |
| Systolic                                   |          | 145 ± 4 <sup>b</sup>    | 162 ± 5 <sup>a</sup>    | 147 ± 7 <sup>ab</sup>   |
| Diastolic                                  |          | 111 ± 3 <sup>b</sup>    | 130 ± 6 <sup>a</sup>    | 114 ± 7 <sup>ab</sup>   |
| Body composition                           | 20       |                         |                         |                         |
| Fat (%)                                    |          | 14.4 ± 0.5 <sup>b</sup> | 40.4 ± 0.4 <sup>a</sup> | 41.3 ± 0.3 <sup>a</sup> |
| Lean (%)                                   |          | 68.3 ± 1.0 <sup>a</sup> | 42.4 ± 0.4 <sup>b</sup> | 41.5 ± 0.3 <sup>b</sup> |
| Fluid (%)                                  |          | 8.2 ± 0.1 <sup>b</sup>  | 9.9 ± 0.1 <sup>a</sup>  | 9.9 ± 0.1 <sup>a</sup>  |

<sup>1</sup> Values are mean ± SEM. Means in a row with superscript without a common letter differ, *P* < 0.05.

<sup>2</sup> Blood samples were obtained from food-deprived mice.

## Online Supporting Material

**SUPPLEMENTAL FIGURE 1** Mouse aortic endothelial cells (MAEC) from *db/db* mice. Confluent monolayer of MAEC imaged under phase-contrast microscopy (A). Characterization of MAEC with endothelial cell marker DiO-Ac-LDL and the uptake of Dio-Ac-LDL by MAEC is shown by fluorescence (B).

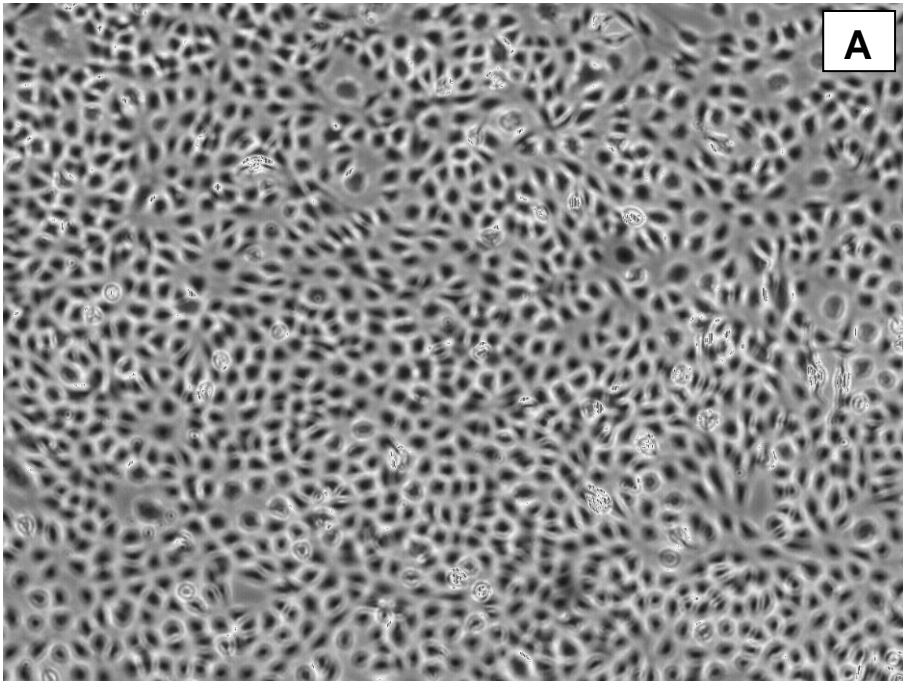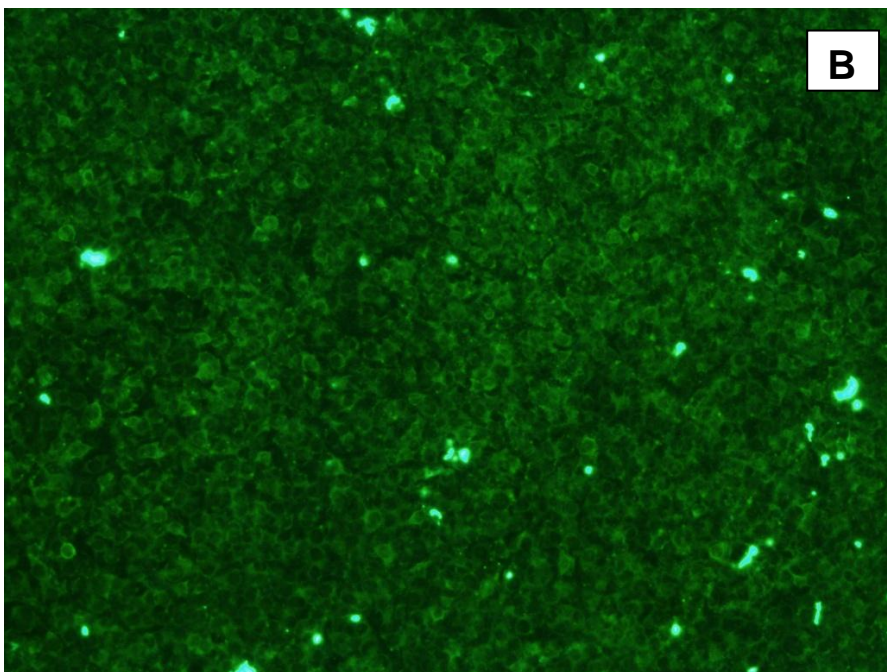

Supplement: nut152322-ST1_SFig1.pdf [file nut152322-ST1_SFig1.pdf]
